# Supplementary material for: Anion-induced conformational changes in 2,7-disubstituted indole-based receptors
Source: Royal Society of Chemistry journal article supplement (doi:10.1039/b908947k), 2009-01-01
Supplement: b908947k.pdf [file b908947k.pdf]

## Supplementary data:

# Anion-induced conformational changes in 2,7-disubstituted indole-based receptors

**Damjan Makuc,<sup>a</sup> Martina Lenarčič,<sup>a</sup> Gareth W. Bates,<sup>c</sup> Philip A. Gale<sup>\*c</sup> and Janez Plavec<sup>\*a,b</sup>**

<sup>a</sup> Slovenian NMR Center, National Institute of Chemistry, Hajdrihova 19, SI-1000 Ljubljana, Slovenia

<sup>b</sup> Faculty of Chemistry and Chemical Technology, University of Ljubljana, SI-1000 Ljubljana, Slovenia

<sup>c</sup> School of Chemistry, University of Southampton, Southampton SO17 1 BJ, United Kingdom

E-mails: philip.gale@soton.ac.uk; janez.plavec@ki.si; Gale: Tel +44 23 8059 3332; Fax +44 23 8059 6805; Plavec: Tel: +386 147 60 353; Fax: +386 147 60 300.

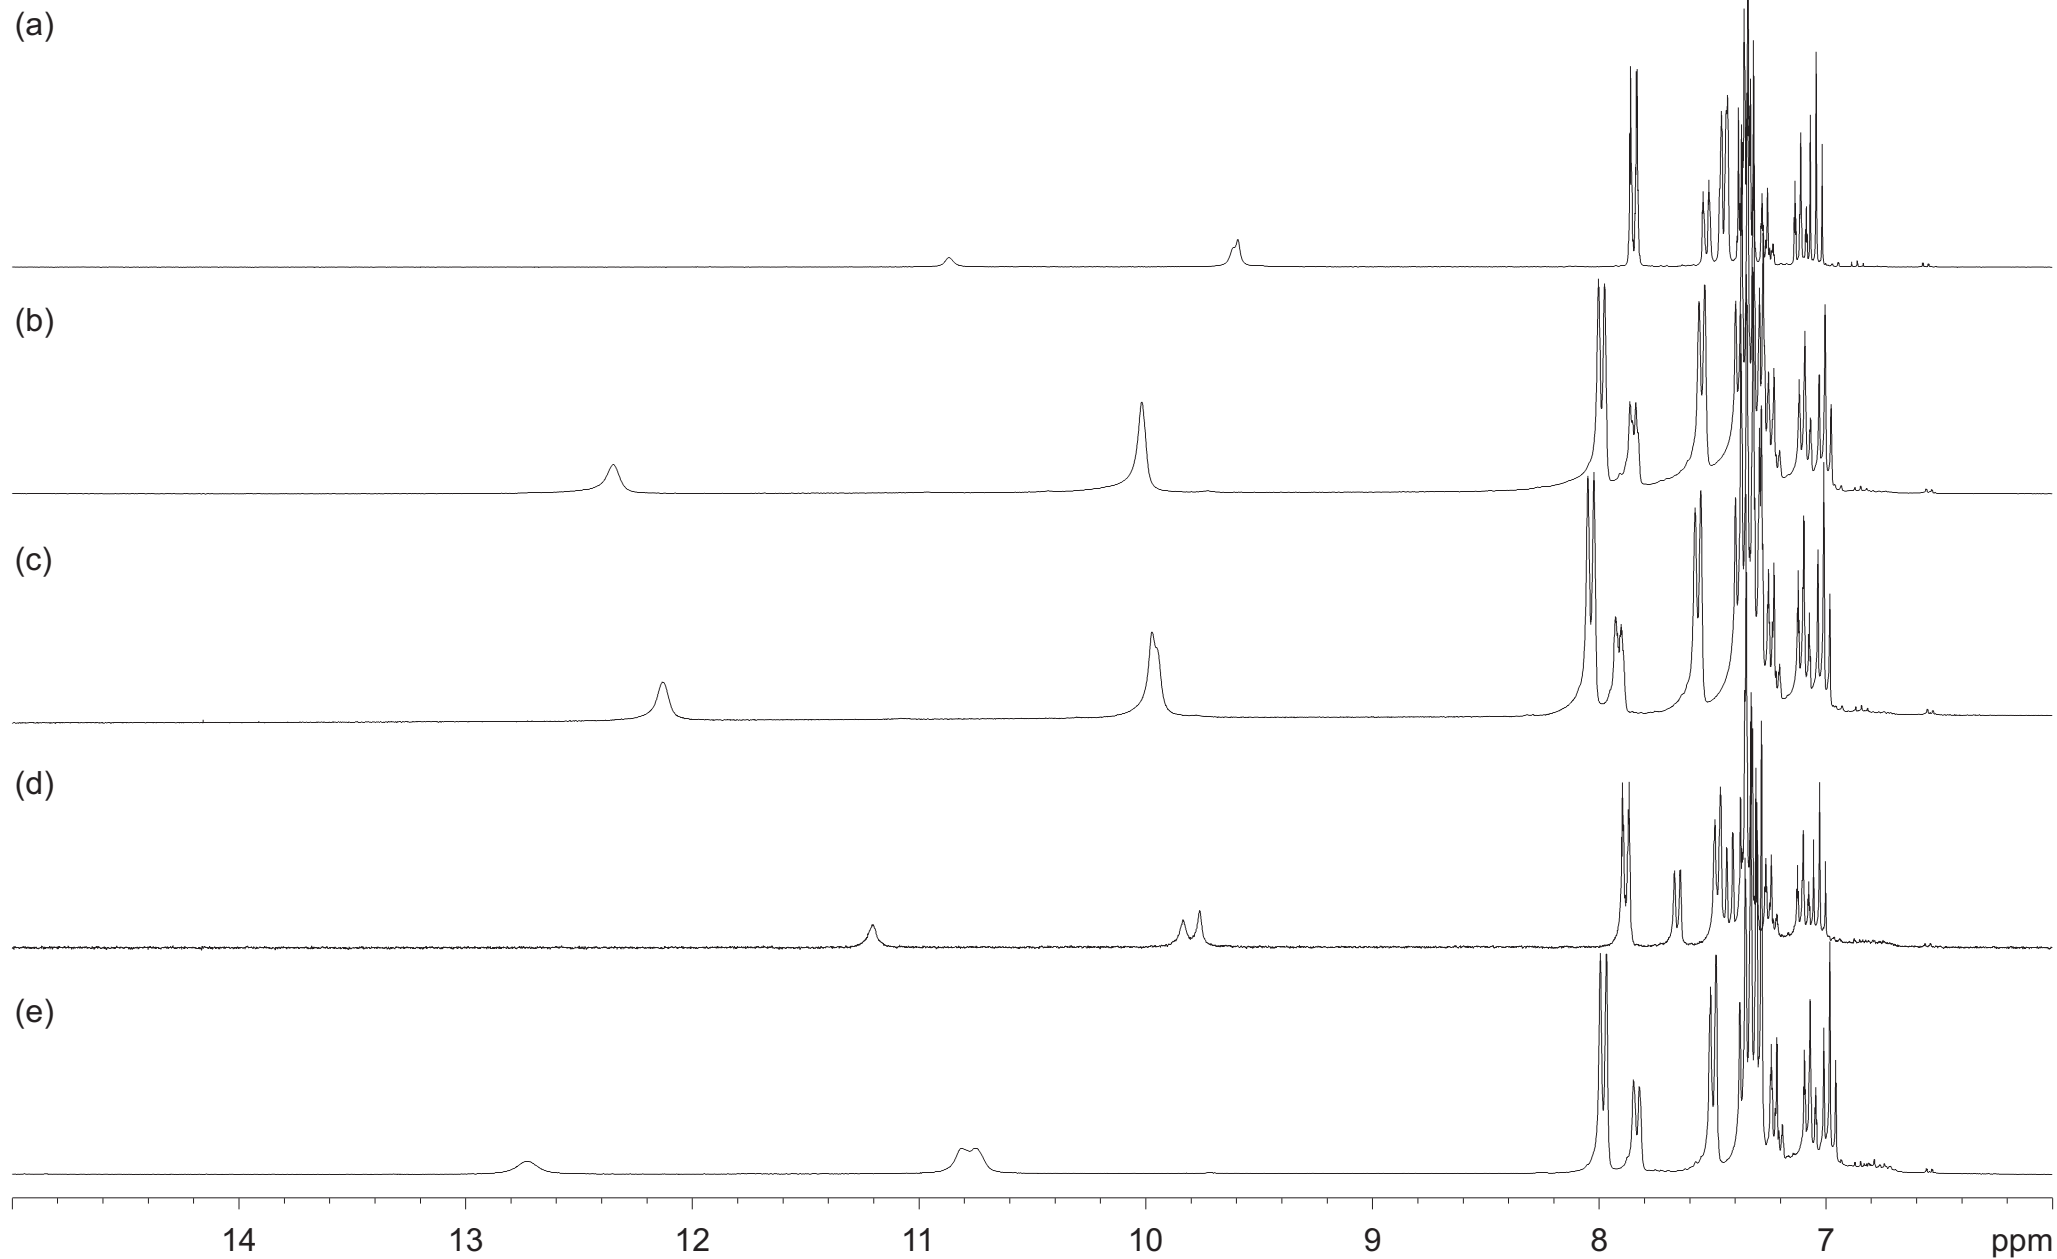

**Figure S1.**  $^1\text{H}$  NMR spectra of **1** in the absence of anions (a) and upon addition of one equivalent of the following anions: chloride (b), bromide (c), nitrate (d) and acetate (e). All spectra were recorded at 298 K.

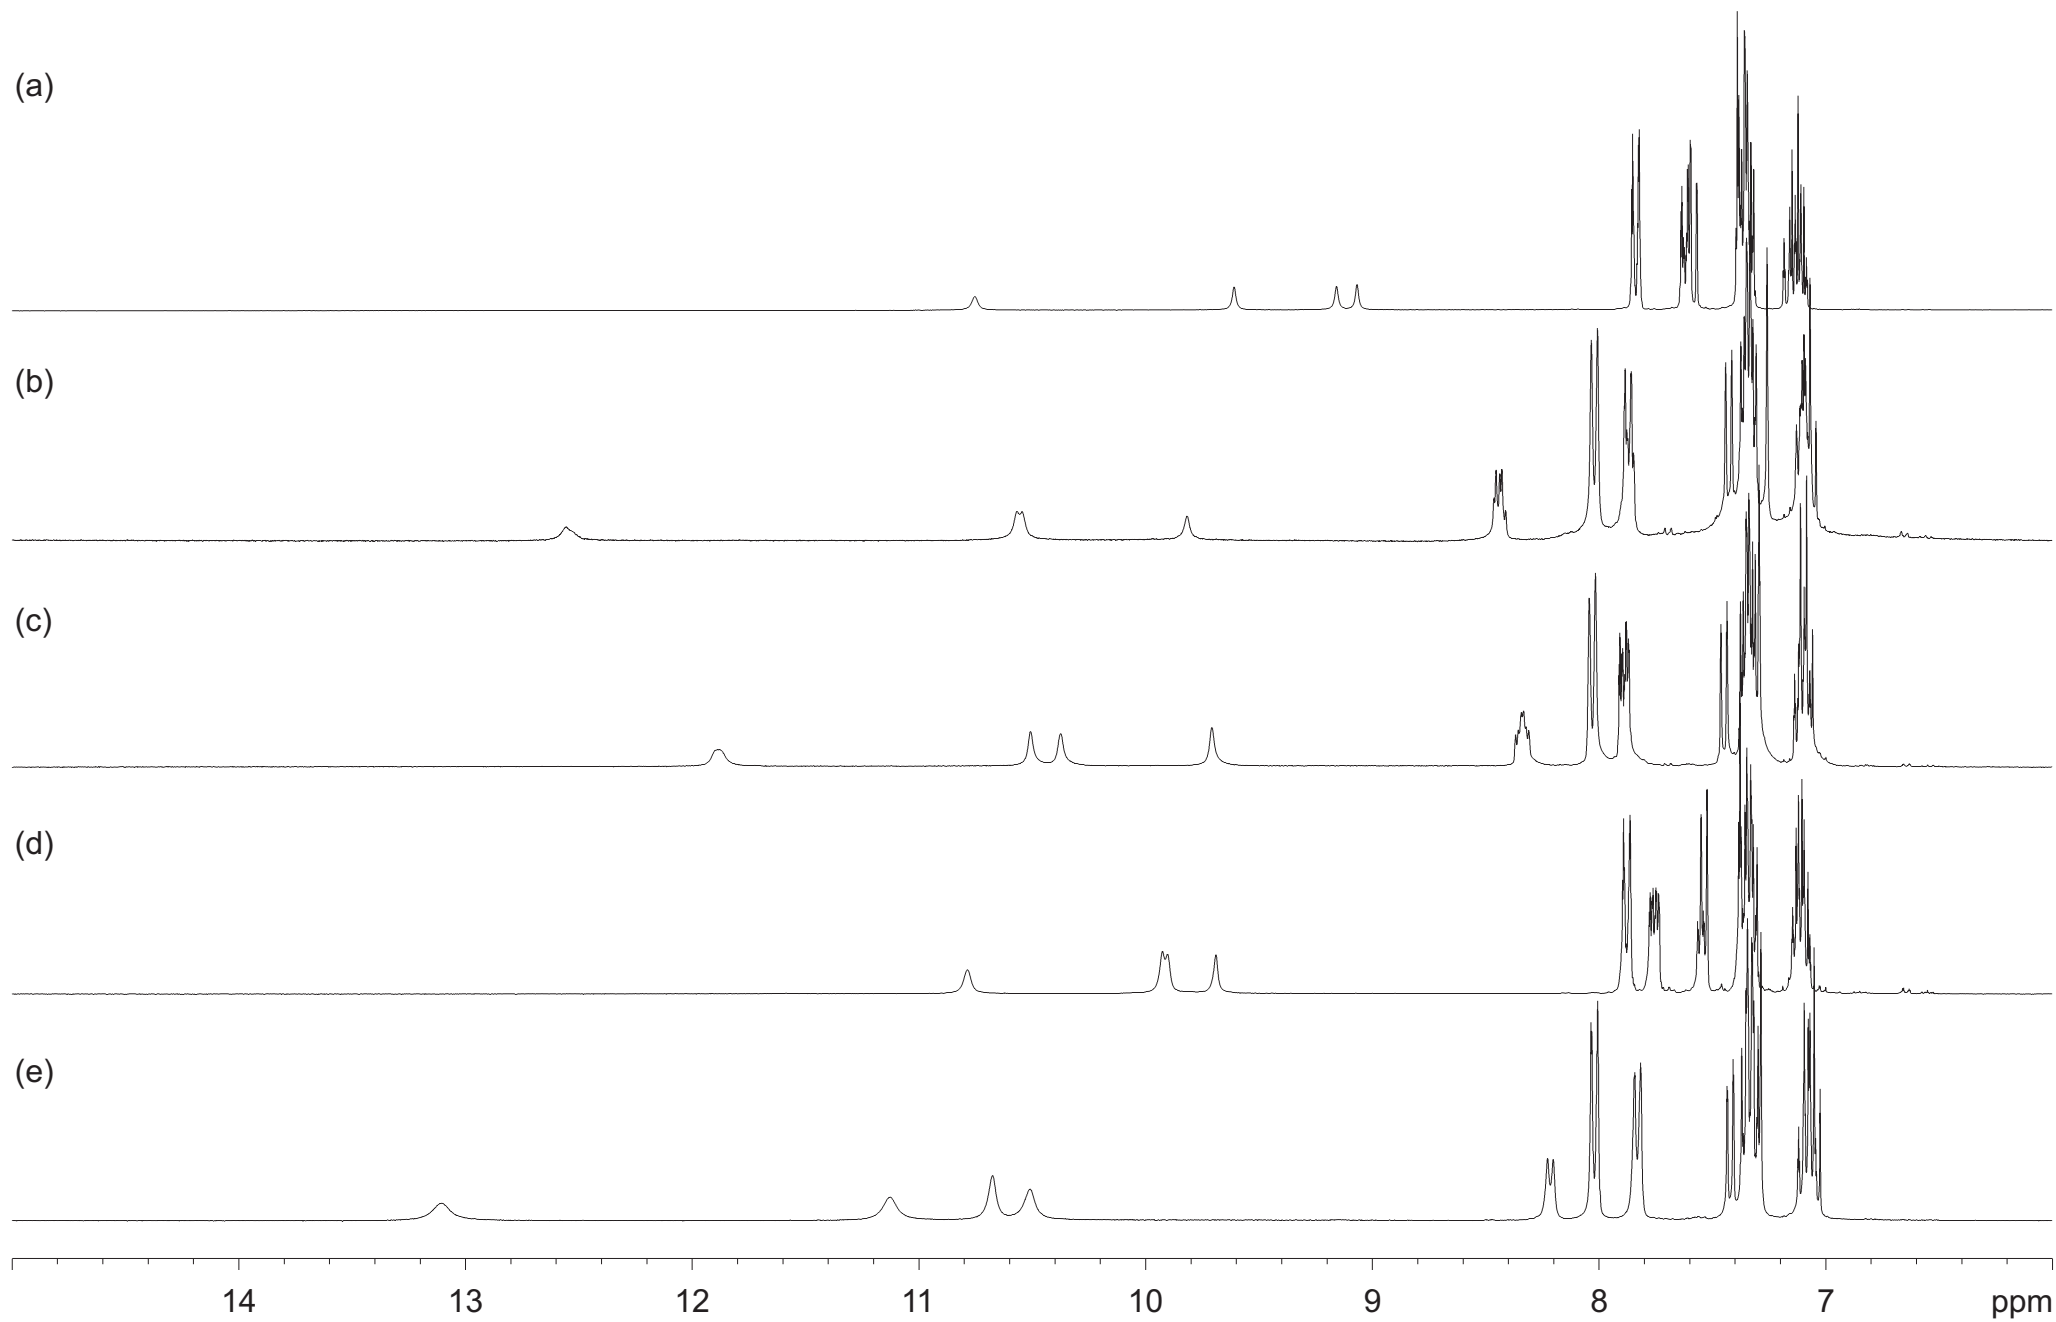

**Figure S2.**  $^1\text{H}$  NMR spectra of **3** in the absence of anions (a) and upon addition of one equivalent of the following anions: chloride (b), bromide (c), nitrate (d) and acetate (e). All spectra were recorded at 298 K.

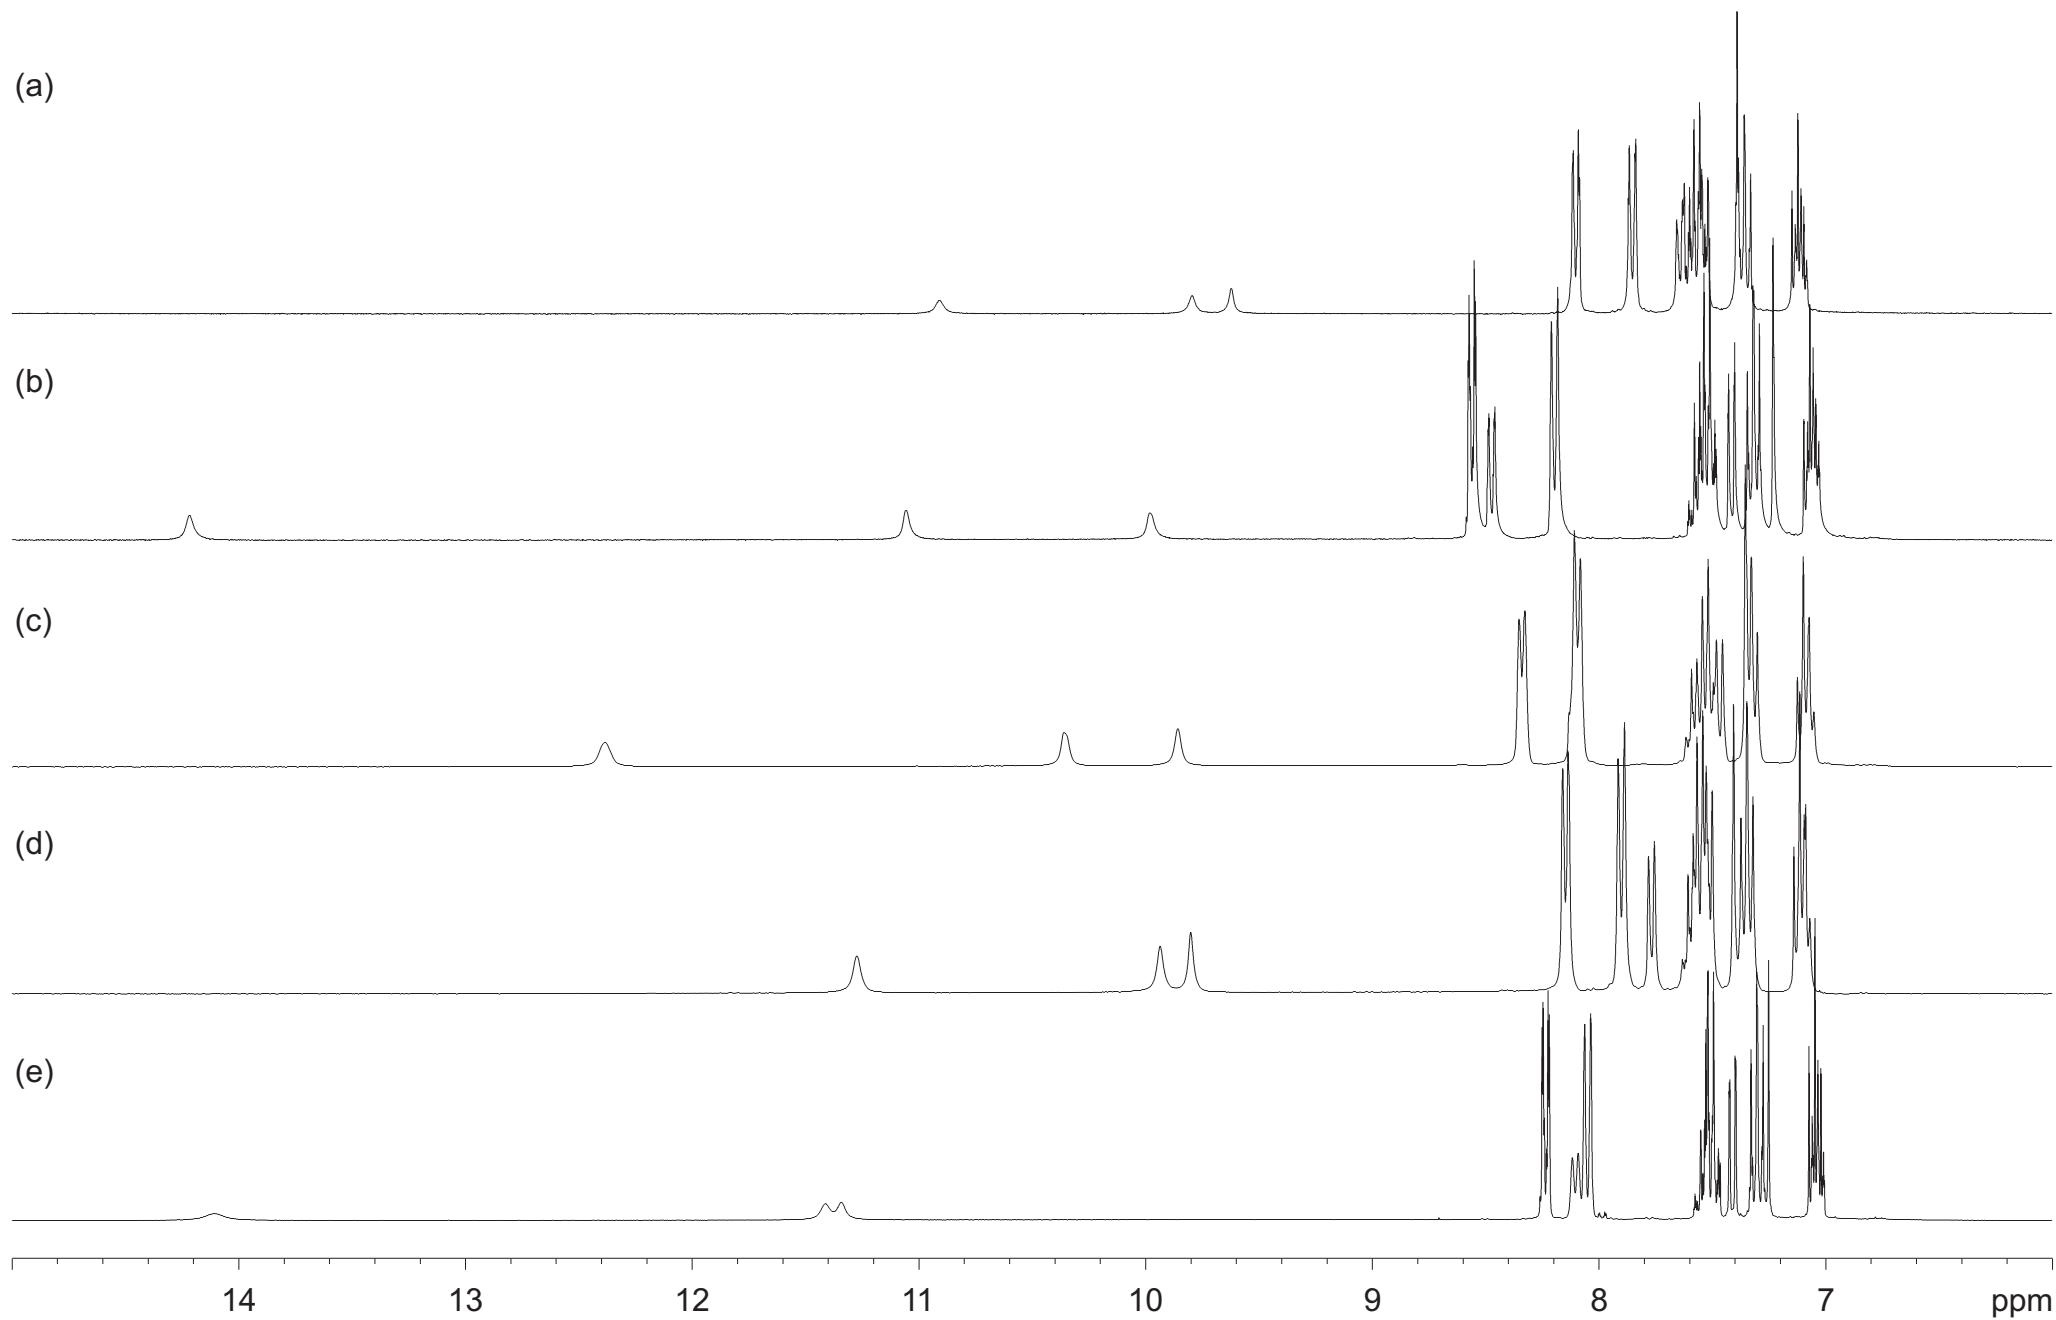

**Figure S3.**  $^1\text{H}$  NMR spectra of **4** in the absence of anions (a) and upon addition of one equivalent of the following anions: chloride (b), bromide (c), nitrate (d) and acetate (e). All spectra were recorded at 298 K.
